# Supplementary material for: Sporulosol, a New Ketal from the Fungus Paraconiothyrium sporulosum
Source: PubMed Central journal article supplement (PMC6100215; doi:10.3390/molecules23061263), 2018-05-25

# Sporulosol, a New Ketal from the Fungus *Paraconiothyrium sporulosum*

Chen Zhao <sup>1</sup>, Peinan Fu <sup>1,2</sup>, Yang Zhang <sup>1</sup>, Xingzhong Liu <sup>3</sup>, Fengxia Ren <sup>1,\*</sup> and Yongsheng Che <sup>1,\*</sup>

<sup>1</sup> State Key Laboratory of Toxicology & Medical Countermeasures, Beijing Institute of Pharmacology & Toxicology, Beijing 100850, China; lfyz34304@126.com (C.Z.); fpn1109@aliyun.com (P.F.); zhangyang@bmi.ac.cn (Y.Z.)

<sup>2</sup> College of Pharmacy, Nanjing University of Chinese Medicine, Nanjing 210023, China

<sup>3</sup> State Key Laboratory of Mycology, Institute of Microbiology, Chinese Academy of Sciences, Beijing 100190, China; liuxz@im.ac.cn

\* Correspondence: renfx@bmi.ac.cn (F.R.); cheys@im.ac.cn (Y.C.); Tel.: +86-10-6693-2679 (Y.C.)

| <b>Contents</b>                                                                                                        | <b>Page</b> |
|------------------------------------------------------------------------------------------------------------------------|-------------|
| 1) <b>Figure S1.</b> <sup>1</sup> H NMR spectrum of sporulosol ( <b>1</b> ; 400 MHz, acetone- <i>d</i> <sub>6</sub> )  | 3           |
| 2) <b>Figure S2.</b> <sup>13</sup> C NMR spectrum of sporulosol ( <b>1</b> ; 100 MHz, acetone- <i>d</i> <sub>6</sub> ) | 4           |
| 3) <b>Figure S3.</b> HSQC spectrum of sporulosol ( <b>1</b> ; 400 MHz, acetone- <i>d</i> <sub>6</sub> )                | 5           |
| 4) <b>Figure S4.</b> HMBC spectrum of sporulosol ( <b>1</b> ; 400 MHz, acetone- <i>d</i> <sub>6</sub> )                | 6           |
| 5) <b>Figure S5.</b> <sup>1</sup> H NMR spectrum of compound <b>2</b> (600 MHz, acetone- <i>d</i> <sub>6</sub> )       | <b>7</b>    |
| 6) <b>Figure S6.</b> <sup>13</sup> C NMR spectrum of compound <b>2</b> (150 MHz, acetone- <i>d</i> <sub>6</sub> )      | 8           |
| 7) <b>Figure S7.</b> HPLC chromatogram of sporulosol ( <b>1</b> ) using a CHIRALPAK<br>AD-H column                     | 9           |
| 8) <b>Figure S8.</b> HPLC chromatogram of enalin A ( <b>5</b> ) using a CHIRALPAK<br>AD-H column                       | 10          |
| 9) <b>Figure S9.</b> HPLC–CD chromatogram of enalin A ( <b>5</b> ) using a CHIRALPAK<br>AD-H column                    | 11          |
| 10) <b>Figure S10.</b> HPLC–MS analysis of the crude extract                                                           | 12          |

**Figure S1.**  $^1\text{H}$  NMR Spectrum of Sporulosol (**1**; 400 MHz, Acetone- $d_6$ )

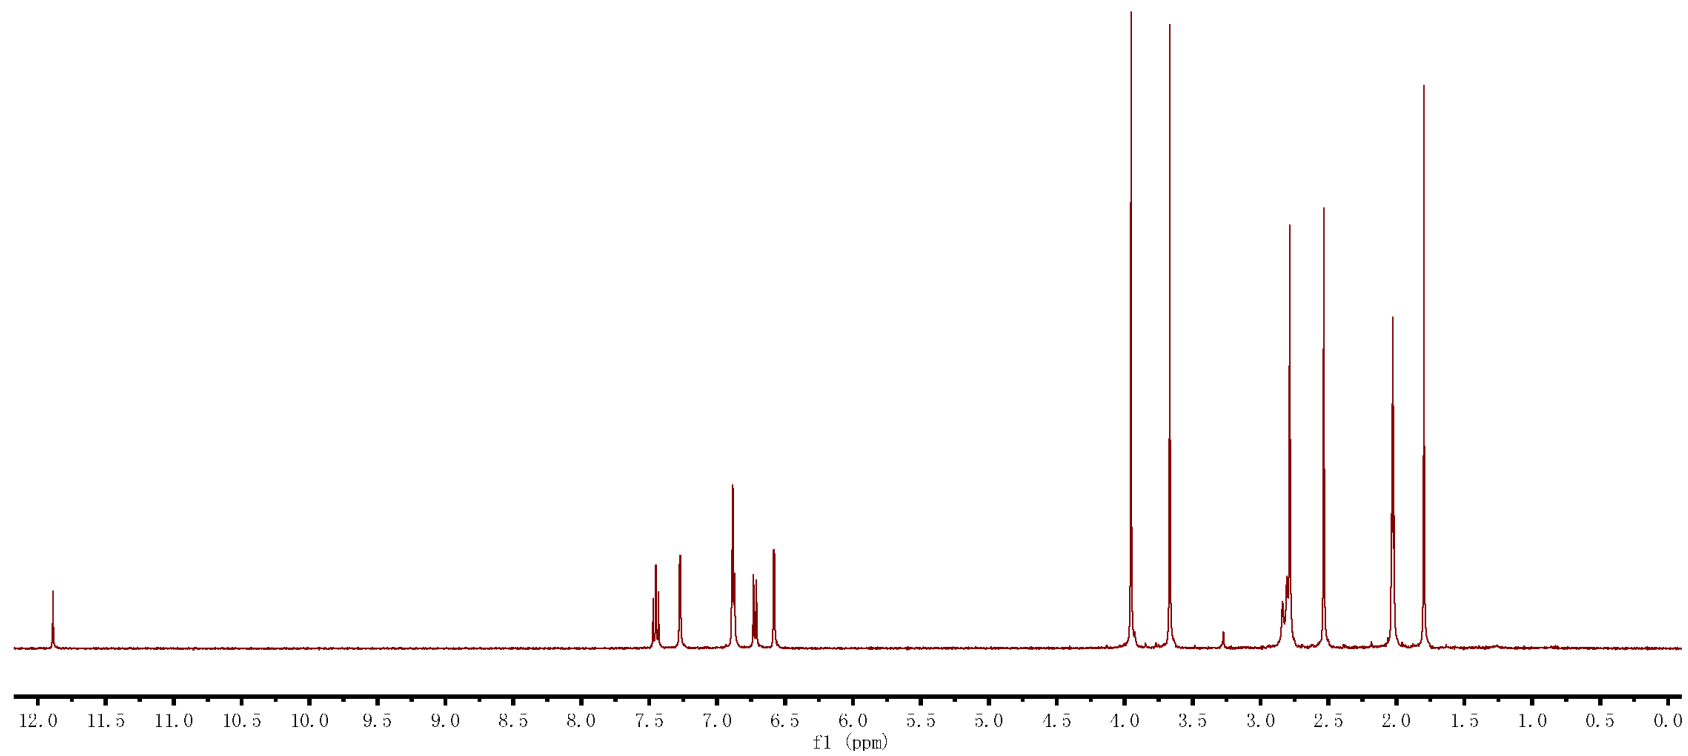

**Figure S2.**  $^{13}\text{C}$  NMR Spectrum of Sporulosol (**1**; 100 MHz, Acetone- $d_6$ )

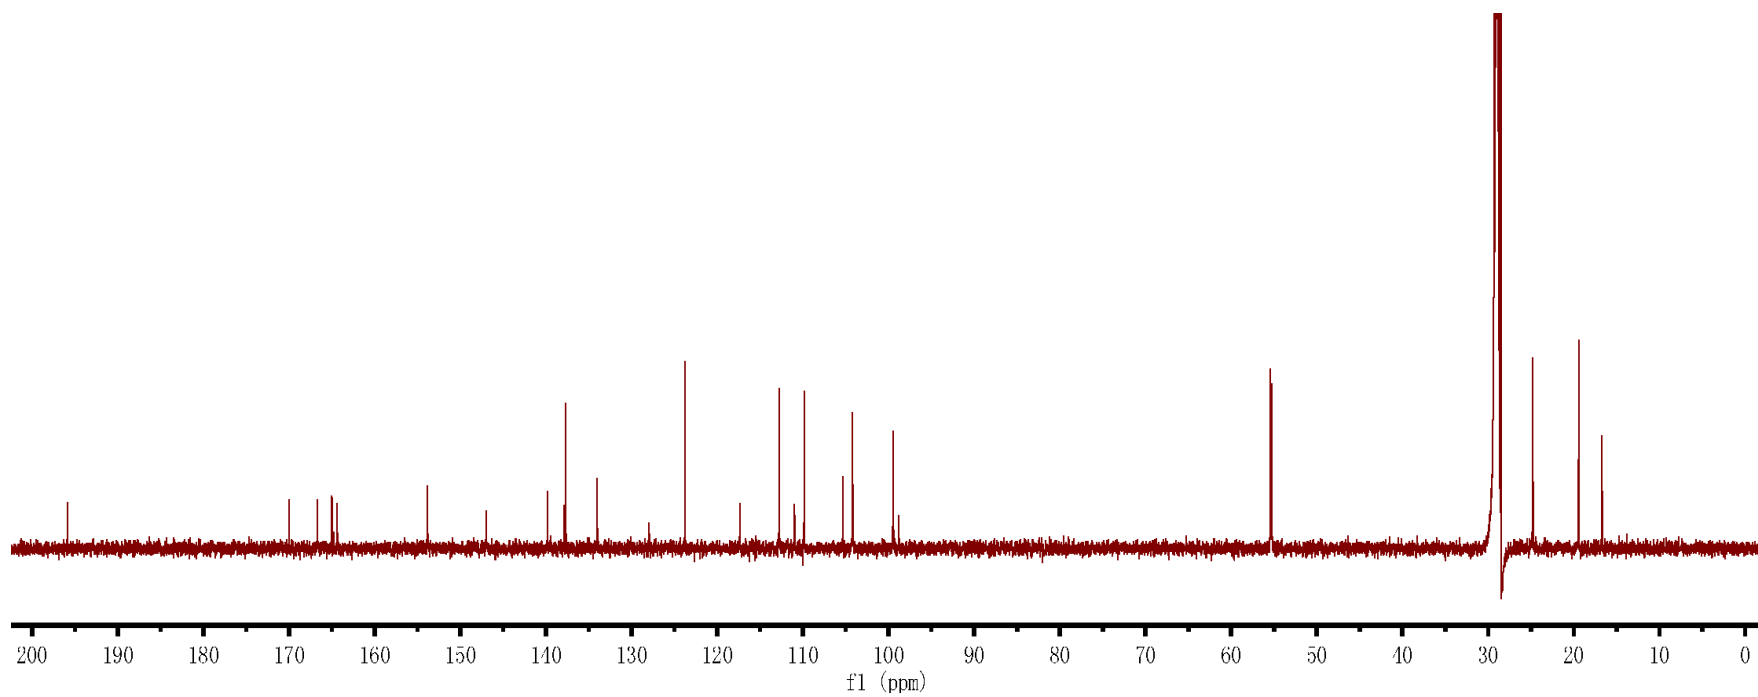

**Figure S3.** HSQC Spectrum of Sporulosol (**1**; 400 MHz, Acetone-*d*<sub>6</sub>)

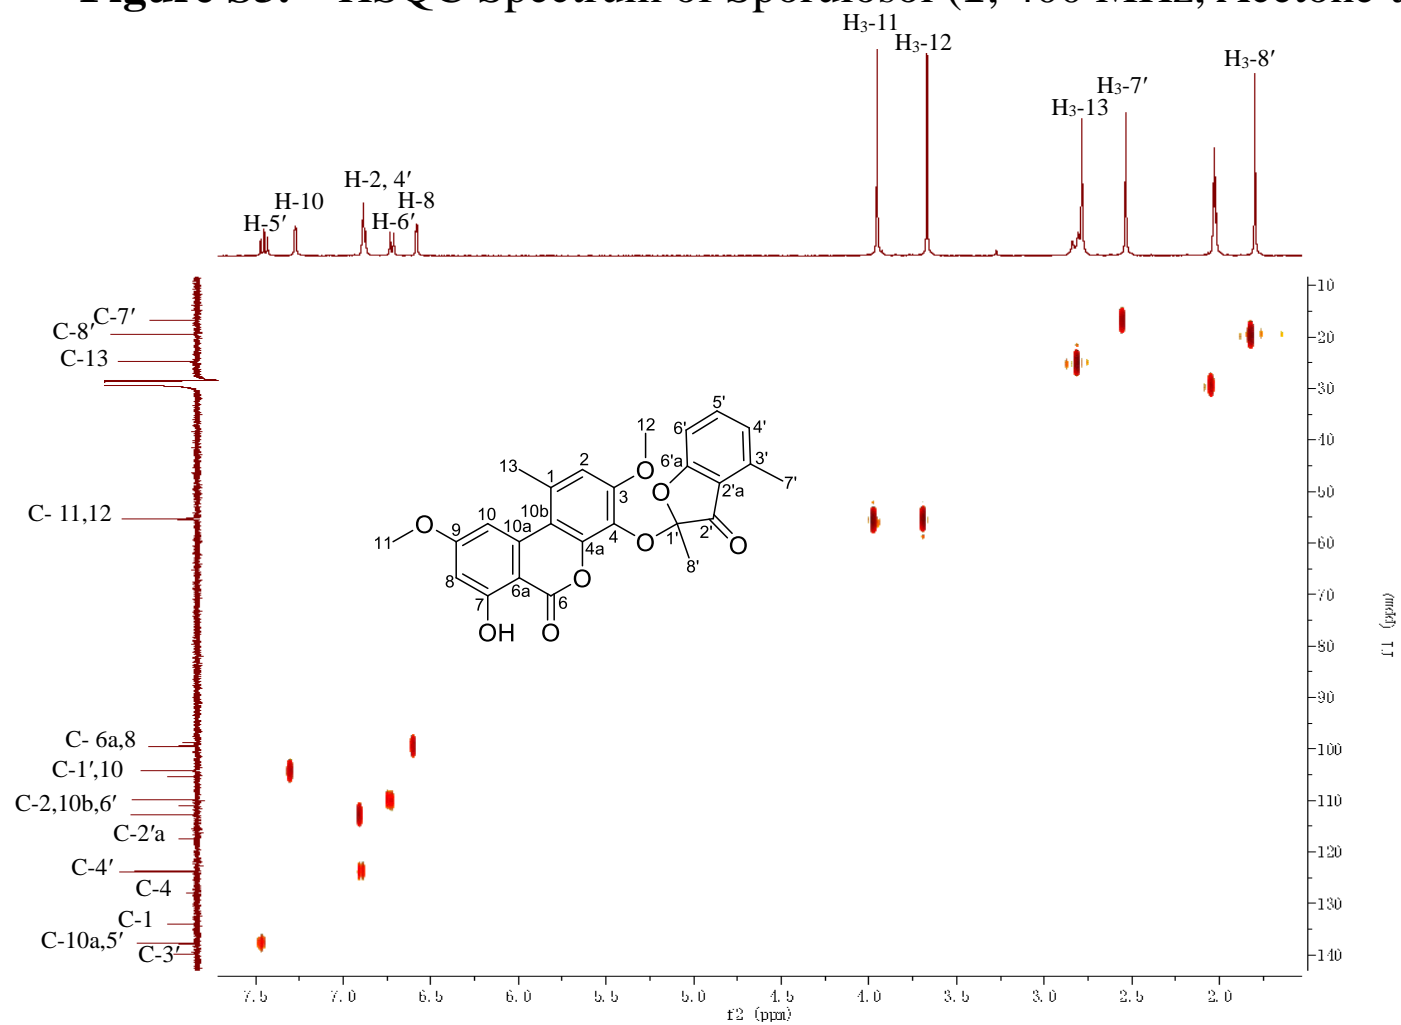

**Figure S4.** HMBC Spectrum of Sporulosol (**1**; 400 MHz, Acetone-*d*<sub>6</sub>)

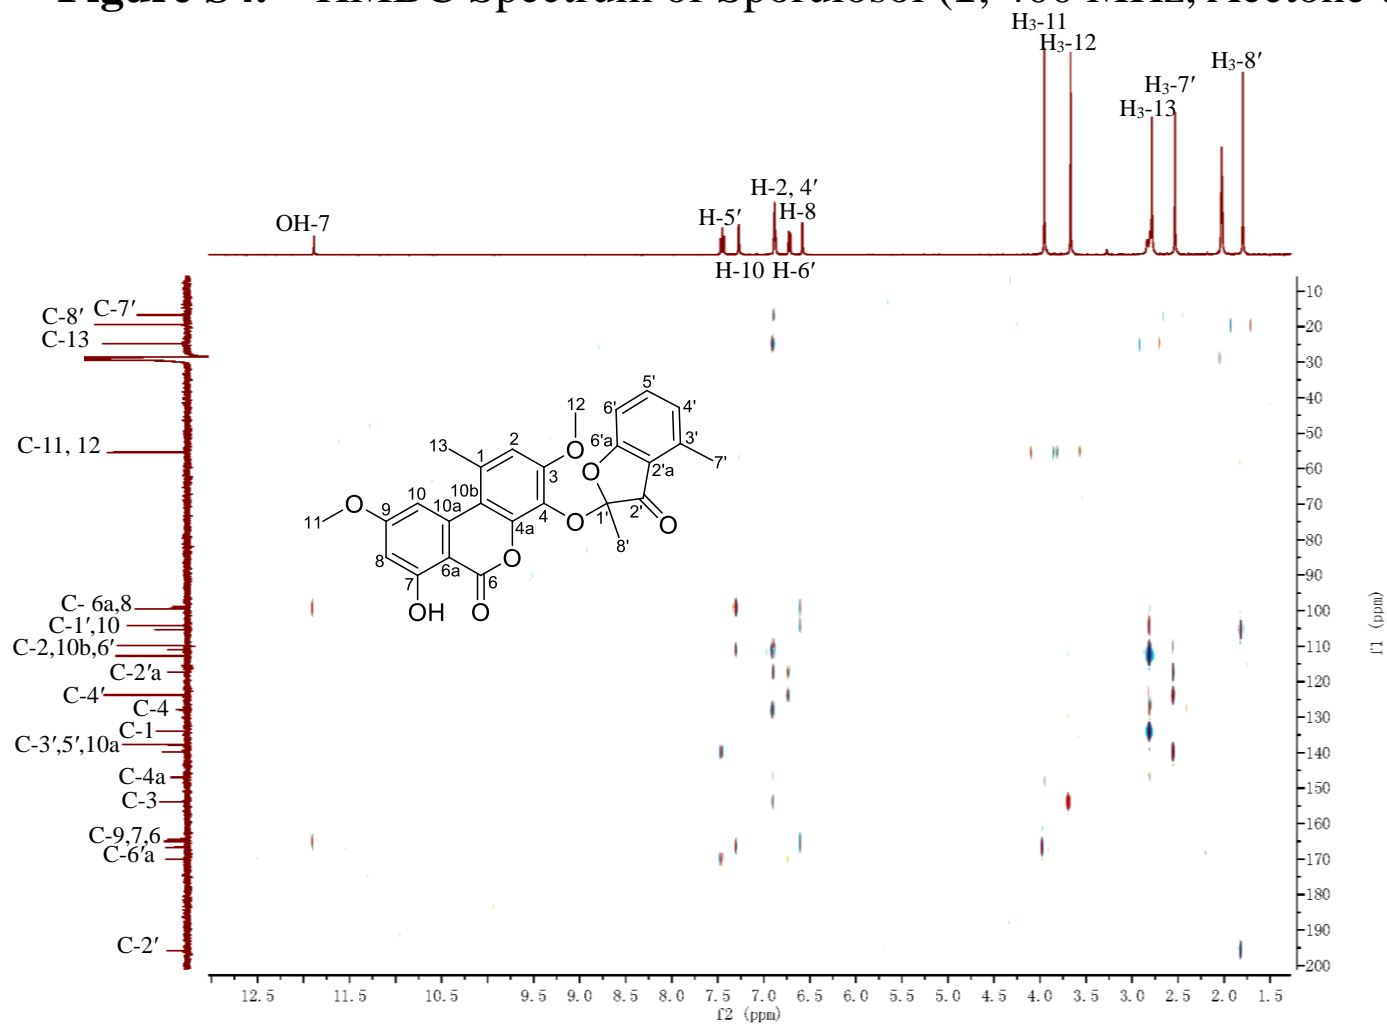

**Figure S5.**  $^1\text{H}$  NMR Spectrum of Compound **2** (600 MHz, Acetone- $d_6$ )

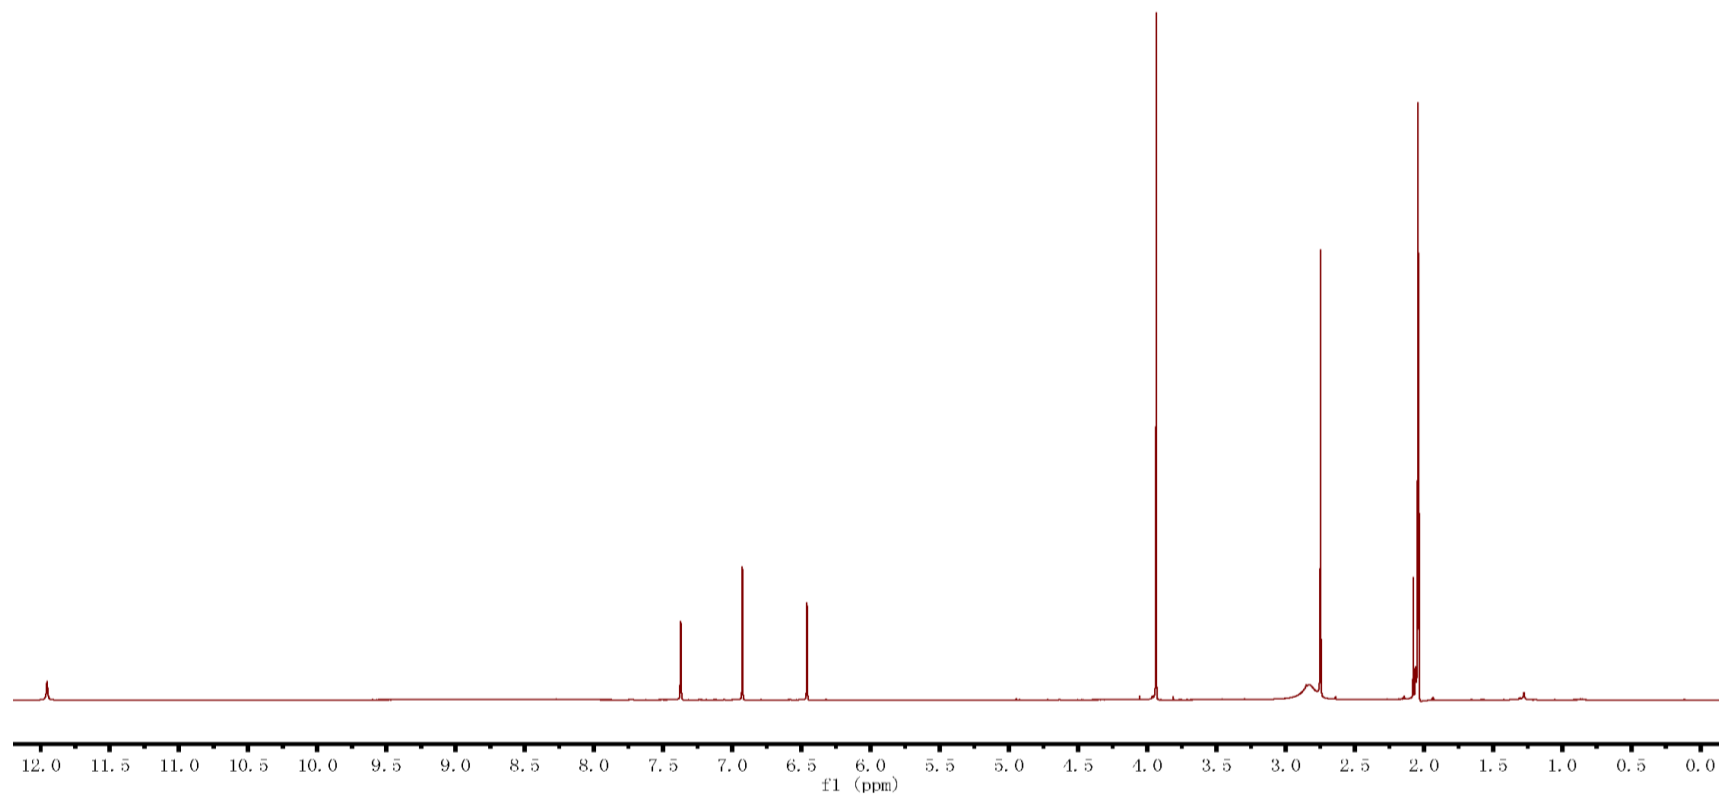

**Figure S6.**  $^{13}\text{C}$  NMR Spectrum of Compound **2** (150 MHz, Acetone- $d_6$ )

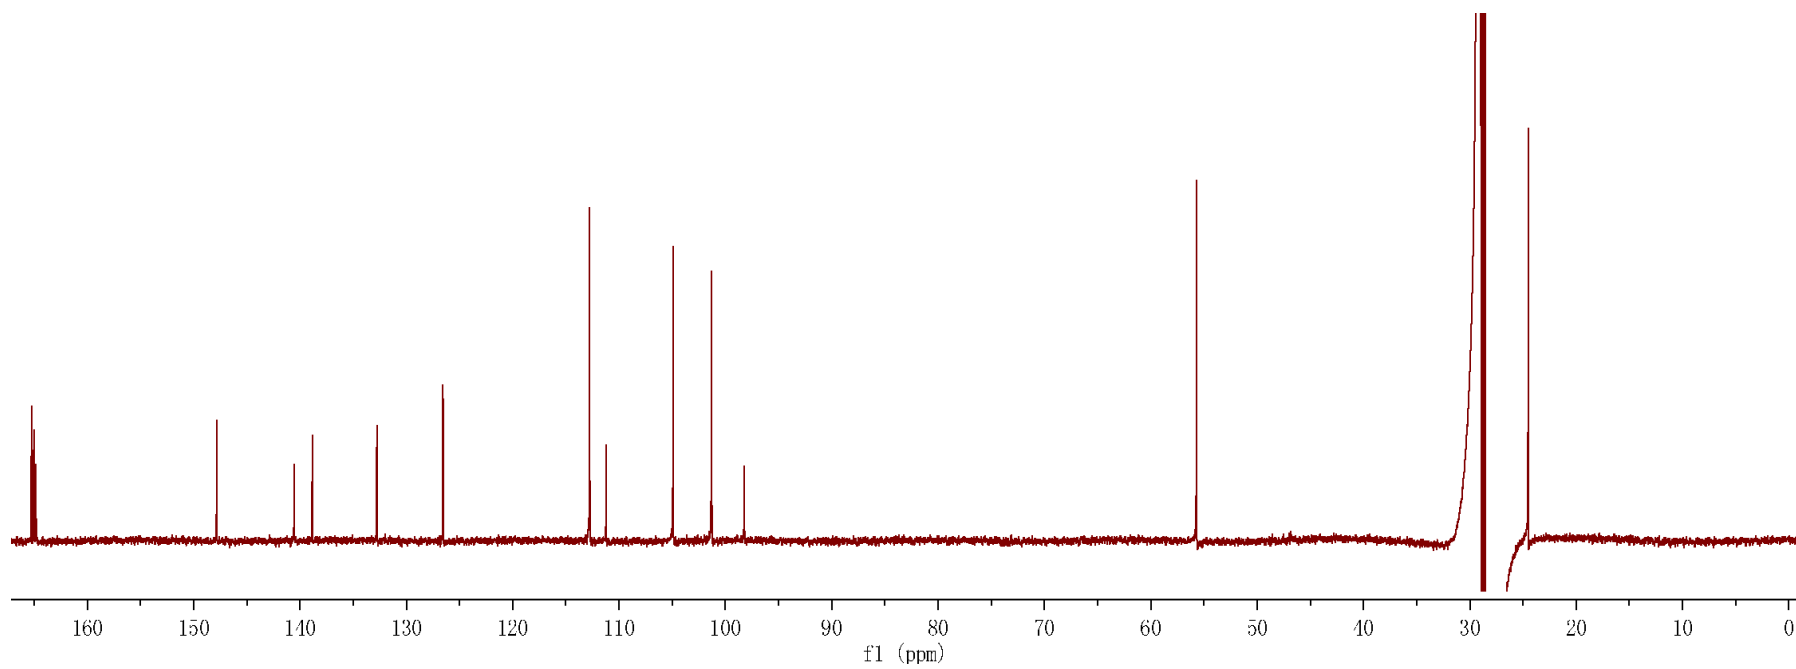



**Figure S7.** HPLC Chromatogram of Sporulosol (**1**) Using a CHIRALPAK AD-H Column

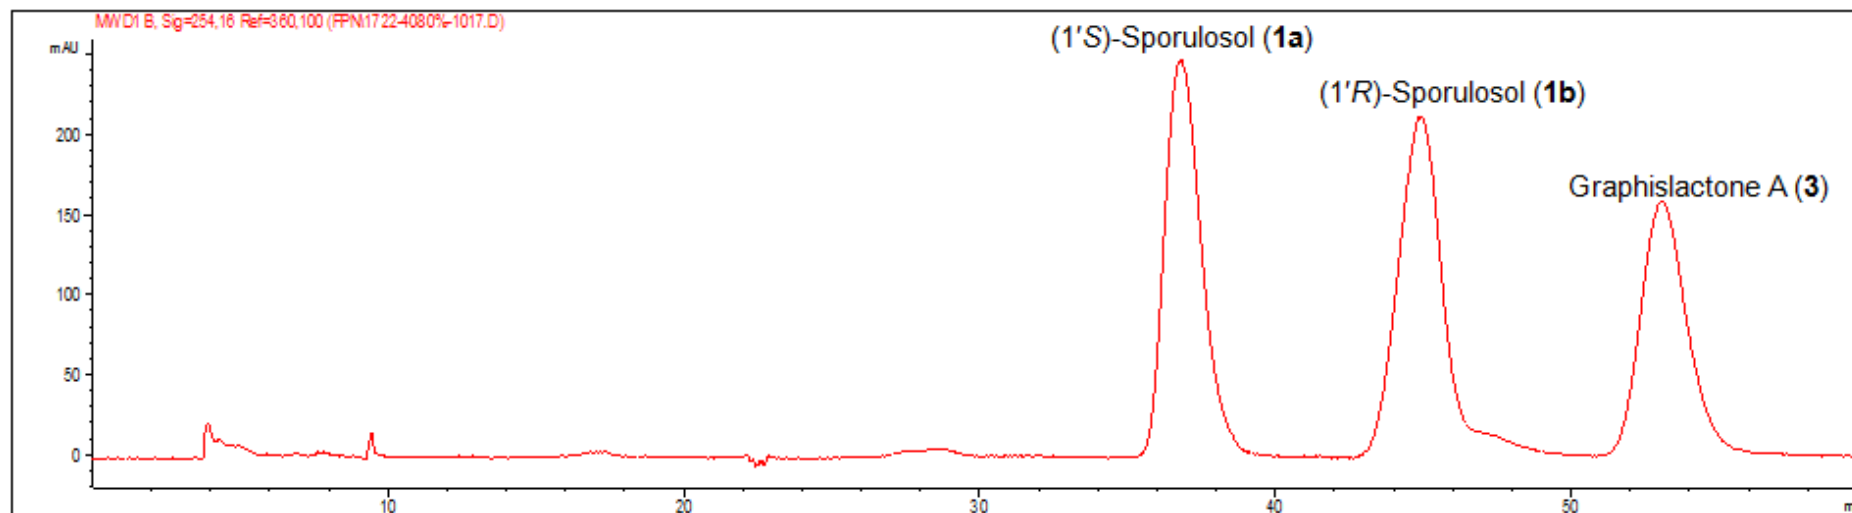

(4.6 × 250 mm; 4% 2-Propanol in Hexane for 60 min; 0.8 mL/min)

**Figure S8.** HPLC Chromatogram of Enalin A (**5**) Using a CHIRALPAK AD-H Column

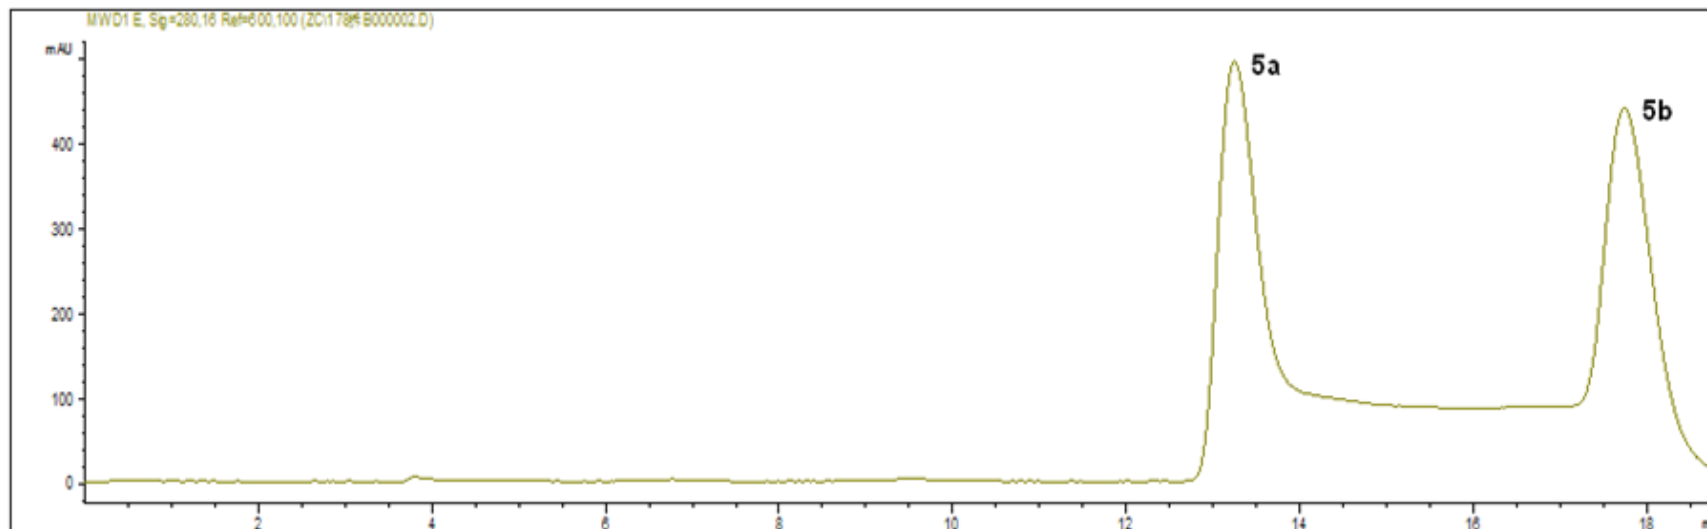

(4.6 × 250 mm; 6% 2-Propanol in Hexane for 20 min; 0.8 mL/min)

**Figure S9.** HPLC-CD Chromatogram of Enalin A (**5**) Using a CHIRALPAK AD-H Column

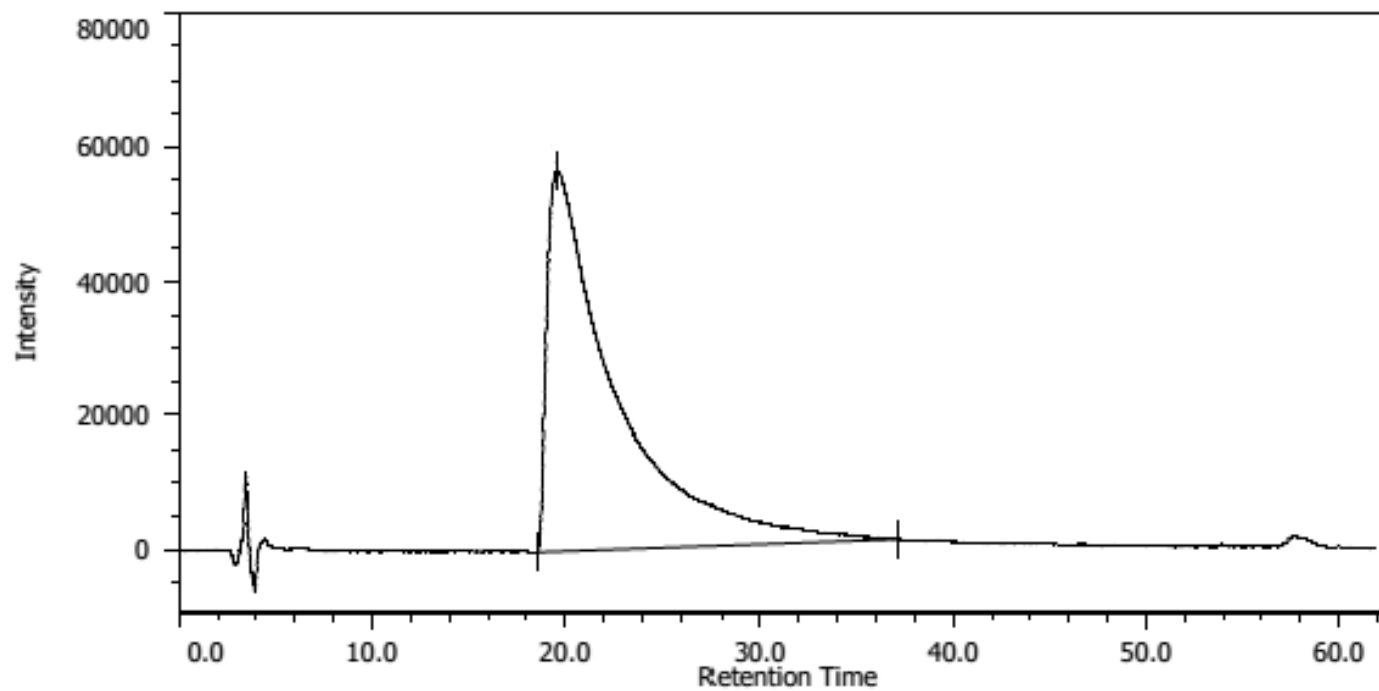

(4.6 × 250 mm; 8% 2-Propanol in Hexane for 63 min; 1.0 mL/min)

**Figure S10.** HPLC–MS Analysis of the Crude Extract

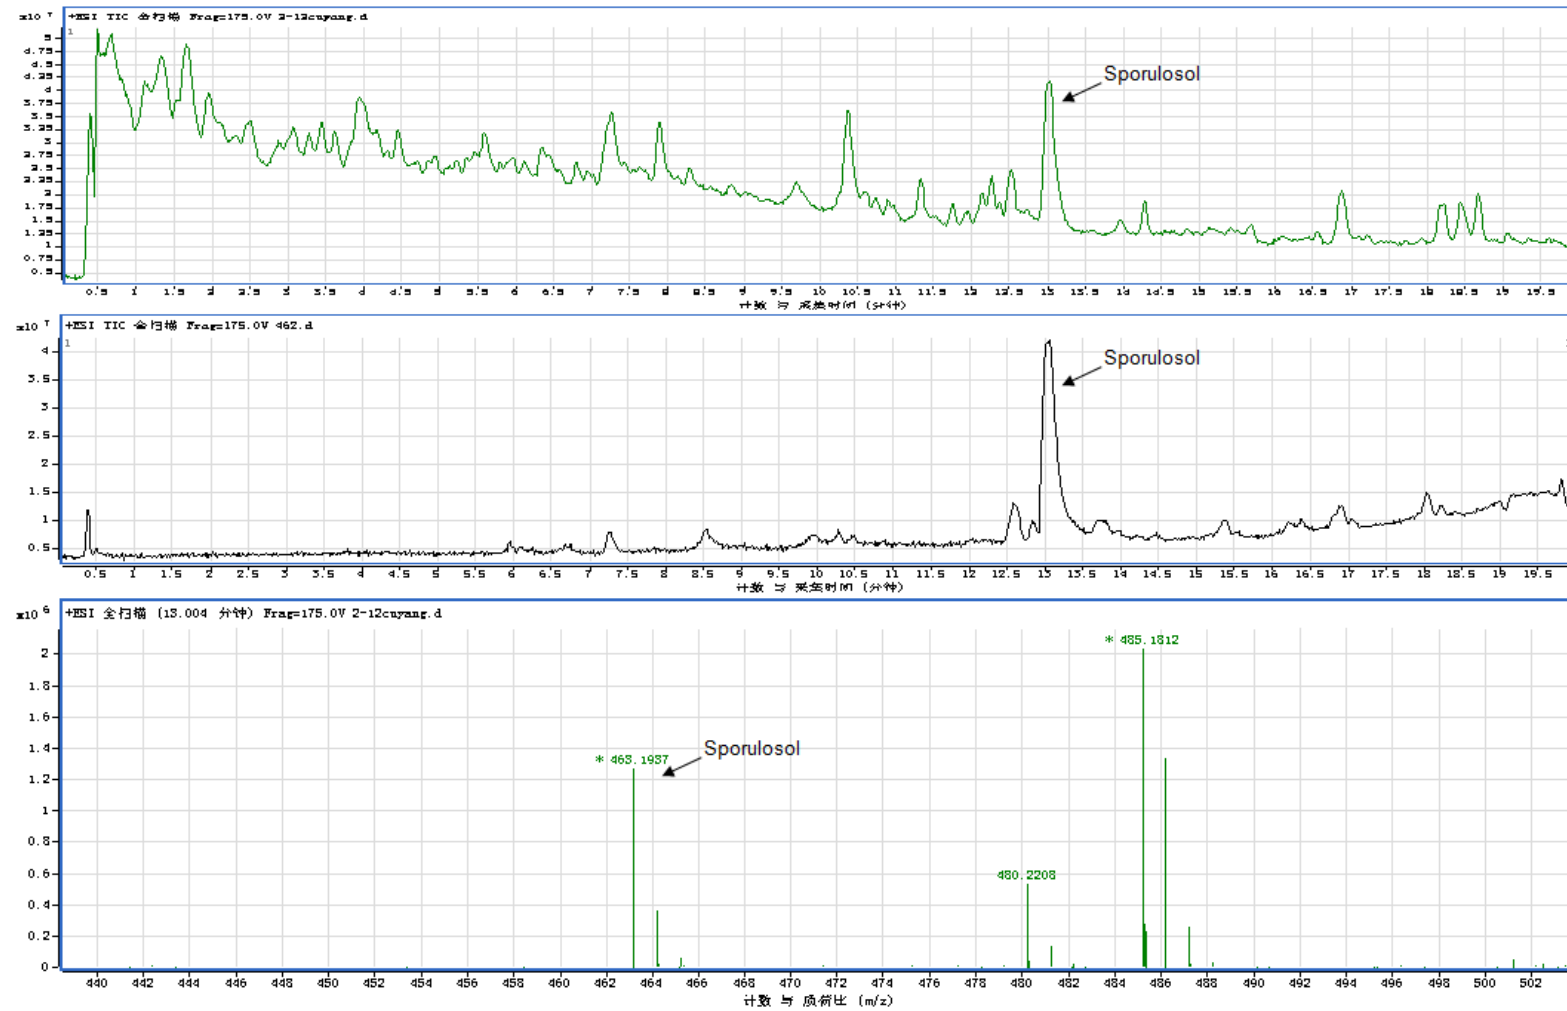

Supplement: molecules-23-01263-s001.pdf [file molecules-23-01263-s001.pdf]
